# Supplementary material for: Sea Water Intrusion: A Case study, Gargub port, Egypt
Source: Research Square preprint supplement (doi:10.21203/rs.3.rs-7428393/v1), 2025-09-26
Supplement: Supplementary file 1 [file 5d8f9dec24bf21bc03638ae8.xlsx]

## Sheet: Sheet1
	VES 1			VES 2			VES 3				VES 4			VES 5				VES 6				VES 7				VES 8				VES 9				VES 10
	AB/2	Resistivity		AB/2	Resistivity		AB/2	Resistivity			AB/2	Resistivity		AB/2	Resistivity			AB/2	Resistivity			AB/2	Resistivity			AB/2	Resistivity			AB/2	Resistivity			AB/2	Resistivity
	1	80		1	40		1	160			1	80		1	70			1	45			1	50			1	220			1	80			1	70
	1.5	76		1.5	37		1.5	155			1.5	75		1.5	70			1.5	45			1.5	48			1.5	210			1.5	80			1.5	70
	2	75		2	33		2	150			2	70		2	60			2	45			2	44			2	209			2	79			2	69
	3	70		3	25		3	130			3	55		3	50			3	44			3	35			3	200			3	70			3	60
	4	60		4	20		4	100			4	45		4	45			4	43			4	27			4	180			4	60			4	50
	5	50		5	20		5	70			5	35		5	30			5	43			5	17.5			5	170			5	45			5	47
	7	39		7	19.5		7	40			7	20		7	25			7	42			7	10			7	140			7	30			7	45
	10	23		10	19		10	18			10	15		10	18			10	41			10	8			10	120			10	20			10	42
	15	15		15	18.5		15	10			15	15		15	13			15	40			15	8			15	100			15	14			15	24
	20	10		20	20		20	9			20	15		20	12.5			20	42			20	8.5			20	90			20	10			20	24
	30	6		30	21		30	8			30	17		30	9			30	44			30	8			30	80			30	7			30	26
	40	3		40	23		40	7.8			40	20		40	7			40	44			40	7			40	80			40	5			40	28
	50	2		50	24		50	6.2			50	22		50	5			50	43			50	5			50	70			50	3			50	25
	70	1		70	26		70	3.9			70	24		70	2.5			70	38			70	2.5			70	60			70	2			70	25
	100	0.55		100	27		100	1.85			100	23		100	1.3			100	30			100	1.3			100	40			100	1.3			100	18
	150	0.35		150	21		150	1			150	19		150	0.5			150	18			150	0.8			150	15			150	0.8			150	11
	200	0.3		200	17		200	0.75			200	14		200	0.44			200	10			200	0.7			200	8			200	0.7			200	6
	300	0.3		300	9		300	0.7			300	7		300	0.4			300	4			300	0.65			300	2.4			300	0.65			300	2.5
	400	0.3		400	5		400	0.65			400	5		400	0.38			400	2.5			400	0.65			400	1.8			400	0.65			400	1.5
	500	0.3		500	2.9		500	0.63			500	4		500	0.38			500	1.8			500	0.7			500	1.7			500	0.65			500	1.4
	700	0.3		700	2.2		700	0.6			700	3		700	0.38			700	1.6			700	0.7			700	1.6			700	0.65			700	1.3
