# Supplementary material for: Sea Water Intrusion: A Case study, Gargub port, Egypt
Source: Research Square preprint supplement (doi:10.21203/rs.3.rs-7428393/v1), 2025-09-26
Supplement: Supplementary file 2 [file f3968e8c14f2d4a5d8b0c889.xlsx]

## Sheet: Sheet1
TEM 1															TEM 2															TEM 3															TEM 4
TEM-FAST	48	HPC/S2	Date:	Tue	Jul	5	14:10:18	2022							TEM-FAST	48	HPC/S2	Date:	Tue	Jul	5	14:44:14	2022							TEM-FAST	48	HPC/S2	Date:	Tue	Jul	5	12:48:53	2022							TEM-FAST	48	HPC/S2	Date:	Tue
Place:	M20														Place:	M19														Place:	M18														Place:	M17
#Set	SHIMAA	S													#Set	SHIMAA	S													#Set	SHIMAA	S													#Set	SHIMAA	S
Time-Range	9	Stacks	3	deff=	8	us	I=2.7	A	FILTR=50	Hz	AMPLIFER=OFF				Time-Range	9	Stacks	3	deff=	8	us	I=2.7	A	FILTR=50	Hz	AMPLIFER=OFF				Time-Range	9	Stacks	3	deff=	8	us	I=2.7	A	FILTR=50	Hz	AMPLIFER=OFF				Time-Range	9	Stacks	3	deff=
T-LOOP	(m)	100	R-LOOP	(m)	100	TURN=	1								T-LOOP	(m)	100	R-LOOP	(m)	100	TURN=	1								T-LOOP	(m)	100	R-LOOP	(m)	100	TURN=	1								T-LOOP	(m)	100	R-LOOP	(m)
Comments:	WIN	XP/7	X32/X64	(2013)											Comments:	WIN	XP/7	X32/X64	(2013)											Comments:	WIN	XP/7	X32/X64	(2013)											Comments:	WIN	XP/7	X32/X64	(2013)
Location:x=	0	y=	0	z=	0										Location:x=	0	y=	0	z=	0										Location:x=	0	y=	0	z=	0										Location:x=	0	y=	0	z=
Channel	Time	E/I[V/A]	Err[V/A]												Channel	Time	E/I[V/A]	Err[V/A]												Channel	Time	E/I[V/A]	Err[V/A]												Channel	Time	E/I[V/A]	Err[V/A]
1	4.06	0.8275	0.002493												1	4.06	0.8095	0.001808												1	4.06	0.8876	0.002938												1	4.06	0.7712	0.001371
2	5.07	0.4559	0.001238												2	5.07	0.4272	0.0007813												2	5.07	0.4484	0.001297												2	5.07	0.4396	0.0007101
3	6.07	0.2881	0.0007051												3	6.07	0.2809	0.0004101												3	6.07	0.2892	0.0007351												3	6.07	0.263	0.0003819
4	7.08	0.2069	0.0004189												4	7.08	0.201	0.0003389												4	7.08	0.1856	0.0004773												4	7.08	0.1856	0.0003654
5	8.52	0.2101	0.0003371												5	8.52	0.2043	0.0002339												5	8.52	0.1914	0.0001933												5	8.52	0.1925	0.0003257
6	10.53	1.792	0.003152												6	10.53	2.074	0.005708												6	10.53	3.331	0.003386												6	10.53	3.491	0.00638
7	12.55	4.113	0.005983												7	12.55	3.866	0.003816												7	12.55	2.672	0.004476												7	12.55	3.009	0.002384
8	14.56	2.912	0.003971												8	14.56	2.748	0.002416												8	14.56	1.751	0.002699												8	14.56	2.124	0.001599
9	17.44	1.995	0.002581												9	17.44	1.898	0.001656												9	17.44	1.17	0.001637												9	17.44	1.488	0.001092
10	21.46	1.335	0.001651												10	21.46	1.278	0.001043												10	21.46	0.7929	0.001021												10	21.46	1.035	0.0006974
11	25.49	0.9597	0.001115												11	25.49	0.9192	0.0007033												11	25.49	0.577	0.0007147												11	25.49	0.7773	0.0004967
12	29.5	0.7206	0.0008449												12	29.5	0.6957	0.0005662												12	29.5	0.4341	0.0005635												12	29.5	0.6106	0.0003828
13	35.28	0.504	0.0005822												13	35.28	0.488	0.0003945												13	35.28	0.3127	0.0004098												13	35.28	0.4547	0.0002943
14	43.3	0.33	0.0003664												14	43.3	0.3233	0.0002531												14	43.3	0.2181	0.0002604												14	43.3	0.3272	0.0002142
15	51.4	0.2291	0.0002815												15	51.4	0.227	0.0001858												15	51.4	0.1621	0.0001819												15	51.4	0.2471	0.0001593
16	59.41	0.1663	0.0002012												16	59.41	0.167	0.000134												16	59.41	0.1269	0.0001687												16	59.41	0.1951	0.0001204
17	70.95	0.1085	0.0001208												17	70.95	0.1135	8.535e-05												17	70.95	0.09085	0.0001311												17	70.95	0.1441	9.416e-05
18	87.07	0.06842	7.955e-05												18	87.07	0.07213	5.224e-05												18	87.07	0.05949	9.492e-05												18	87.07	0.103	6.897e-05
19	103.16	0.04516	6.366e-05												19	103.16	0.0493	4.081e-05												19	103.16	0.04699	6.782e-05												19	103.16	0.07975	4.949e-05
20	119.22	0.03304	4.53e-05												20	119.22	0.03626	2.865e-05												20	119.22	0.03781	8.789e-05												20	119.22	0.0648	4.654e-05
21	142.33	0.022	3.044e-05												21	142.33	0.0248	2.311e-05												21	142.33	0.02841	3.305e-05												21	142.33	0.04918	3.065e-05
22	174.54	0.01418	2.212e-05												22	174.54	0.01591	1.596e-05												22	174.54	0.02009	3.475e-05												22	174.54	0.0368	2.284e-05
23	206.71	0.00988	1.993e-05												23	206.71	0.01116	1.534e-05												23	206.71	0.01572	2.951e-05												23	206.71	0.02865	1.969e-05
24	238.83	0.007384	1.583e-05												24	238.83	0.008456	1.547e-05												24	238.83	0.01289	3.929e-05												24	238.83	0.02342	1.384e-05
25	285.04	0.005196	8.418e-06												25	285.04	0.005959	8.612e-06												25	285.04	0.009862	1.633e-05												25	285.04	0.01813	1.162e-05
26	350	0.003487	8.614e-06												26	350	0.004122	9.536e-06												26	350	0.007464	1.675e-05												26	350	0.01355	9.557e-06
27	413.83	0.002488	7.453e-06												27	413.83	0.003061	6.755e-06												27	413.83	0.005913	1.608e-05												27	413.83	0.01069	9.316e-06
28	478.06	0.001851	8.352e-06												28	478.06	0.002405	7.001e-06												28	478.06	0.004894	1.56e-05												28	478.06	0.00866	8.356e-06
29	570.47	0.001296	4.346e-06												29	570.47	0.001805	3.713e-06												29	570.47	0.003818	7.895e-06												29	570.47	0.006662	4.776e-06
30	699.41	0.0008392	3.985e-06												30	699.41	0.001317	3.643e-06												30	699.41	0.002892	7.779e-06												30	699.41	0.004964	4.017e-06
31	828.06	0.0005975	3.412e-06												31	828.06	0.00103	2.835e-06												31	828.06	0.002287	6.989e-06												31	828.06	0.003849	3.026e-06
32	956.53	0.0004392	3.739e-06												32	956.53	0.0008351	3.489e-06												32	956.53	0.001854	7.525e-06												32	956.53	0.003099	2.923e-06
33	1140.9	0.0003108	2.308e-06												33	1140.9	0.0006488	2.492e-06												33	1140.9	0.001445	3.767e-06												33	1140.9	0.002354	2.337e-06
34	1398.8	0.0002094	1.789e-06												34	1398.8	0.0004962	2.034e-06												34	1398.8	0.001085	3.682e-06												34	1398.8	0.001722	1.922e-06
35	1656.1	0.0001559	1.67e-06												35	1656.1	0.0004016	1.404e-06												35	1656.1	0.0008493	3.359e-06												35	1656.1	0.001327	2.035e-06
36	1913.1	0.0001189	1.8e-06												36	1913.1	0.0003349	2.117e-06												36	1913.1	0.0006893	3.005e-06												36	1913.1	0.001058	1.488e-06
37	2281.9	9.208e-05	1.363e-06												37	2281.9	0.000264	1.08e-06												37	2281.9	0.0005297	1.654e-06												37	2281.9	0.0007968	1.122e-06
38	2797.6	6.507e-05	1.388e-06												38	2797.6	0.000205	1.292e-06												38	2797.6	0.0004021	2.013e-06												38	2797.6	0.0005797	1.178e-06
39	3312.2	4.756e-05	1.395e-06												39	3312.2	0.0001616	1.358e-06												39	3312.2	0.0003131	2.391e-06												39	3312.2	0.0004433	1.178e-06
40	3826.1	3.716e-05	1.327e-06												40	3826.1	0.0001326	1.508e-06												40	3826.1	0.0002517	2.566e-06												40	3826.1	0.0003534	9.642e-07
41	4563.8	2.994e-05	8.177e-07												41	4563.8	9.96e-05	7.302e-07												41	4563.8	0.0001928	1.246e-06												41	4563.8	0.0002647	6.626e-07
42	5595.3	1.853e-05	8.964e-07												42	5595.3	7.287e-05	6.798e-07												42	5595.3	0.0001386	9.324e-07												42	5595.3	0.0001887	7.494e-07
43	6624.4	1.602e-05	9.446e-07												43	6624.4	5.41e-05	7.827e-07												43	6624.4	0.0001046	1.252e-06												43	6624.4	0.0001428	7.648e-07
44	7652.2	1.167e-05	1.055e-06												44	7652.2	4.152e-05	9.58e-07												44	7652.2	8.137e-05	1.231e-06												44	7652.2	0.0001103	7.92e-07
45	9127.6	8.999e-06	5.708e-07												45	9127.6	2.99e-05	4.271e-07												45	9127.6	5.831e-05	7.637e-07												45	9127.6	7.978e-05	5.884e-07
46	11191	6.455e-06	5.528e-07												46	11191	1.974e-05	4.999e-07												46	11191	3.928e-05	7.423e-07												46	11191	5.443e-05	6.449e-07
47	13249	4.933e-06	6.404e-07												47	13249	1.409e-05	4.254e-07												47	13249	2.837e-05	7.52e-07												47	13249	3.875e-05	6.352e-07
48	15304	3.144e-06	7.577e-07												48	15304	9.894e-06	4.562e-07												48	15304	2.1e-05	6.356e-07												48	15304	2.845e-05	5.788e-07
[truncated: 199 more columns]
